# Supplementary material for: Two subgroups in systemic lupus erythematosus with features of antiphospholipid or Sjögren’s syndrome differ in molecular signatures and treatment perspectives
Source: PubMed Central journal article supplement (PMC6378708; doi:10.1186/s13075-019-1836-8), 2019-02-18
Supplement: 13075_2019_1836_MOESM2_ESM.pdf [file 13075_2019_1836_MOESM2_ESM.pdf]

**Supplementary Table S-1.** Showing number of subjects with missing values for each clinical and serological measurement for the controls, SLE patients and the two suggested subgroups of aPL+ SLE and SSA/SSB+ SLE.

| Missing Values                   | Controls | SLE   | aPL+ SLE | SSA/SSB+ SLE |
|----------------------------------|----------|-------|----------|--------------|
|                                  | n=316    | n=378 | n=66     | n=63         |
| Sampling Age                     | 0        | 0     | 0        | 0            |
| Gender                           | 0        | 0     | 0        | 0            |
| Nephritis                        | 3        | 0     | 0        | 0            |
| SLEDAI-2K                        | 316      | 0     | 0        | 0            |
| SLAM                             | 316      | 0     | 0        | 0            |
| SLICC.total                      | 316      | 0     | 0        | 0            |
| Disease Duration                 | 316      | 0     | 0        | 0            |
| Acetylsalicylic Acid             | 313      | 376   | 66       | 63           |
| Azathioprin                      | 316      | 327   | 55       | 58           |
| Calcium and<br>D supplementation | 313      | 343   | 60       | 58           |
| Cyclophosphamide                 | 316      | 377   | 66       | 63           |
| D vitamin                        | 2        | 9     | 0        | 2            |
| Esomeprazol                      | 314      | 368   | 64       | 62           |
| Folic Acid                       | 315      | 354   | 60       | 61           |
| Furosemide                       | 315      | 352   | 62       | 62           |
| Hyrdoxychloroquine               | 316      | 311   | 57       | 51           |
| Ibuprofen                        | 312      | 365   | 62       | 60           |
| Karbamazepin                     | 316      | 374   | 66       | 62           |
| Levothyroxine                    | 296      | 335   | 60       | 55           |
| Methotrexate                     | 316      | 367   | 64       | 63           |
| Mycophenolate                    | 316      | 351   | 63       | 60           |
| Paracetamol                      | 304      | 319   | 59       | 54           |
| Rituximab                        | 314      | 69    | 11       | 8            |
| SNRI                             | 0        | 0     | 0        | 0            |
| SSRI                             | 0        | 0     | 0        | 0            |
| Warfarin                         | 315      | 339   | 45       | 58           |
| A1-antitrypsin                   | 4        | 7     | 3        | 0            |
| Apo A                            | 13       | 76    | 13       | 9            |
| Apo B                            | 13       | 76    | 13       | 9            |
| C1q                              | 316      | 22    | 2        | 2            |
| C2                               | 316      | 43    | 9        | 5            |
| C3                               | 0        | 9     | 2        | 1            |
| C3dg                             | 316      | 121   | 24       | 17           |
| C4                               | 0        | 9     | 2        | 1            |
| TCC                              | 0        | 0     | 0        | 0            |
| Creatinine                       | 0        | 0     | 0        | 0            |
| SLEDAI-2K<br>Proteinurea =4      | 316      | 0     | 0        | 0            |
| ESR                              | 8        | 15    | 3        | 3            |
| Fibrinogen                       | 8        | 11    | 3        | 0            |
| Homocystein                      | 13       | 76    | 13       | 9            |
| Hs CRP                           | 11       | 2     | 0        | 0            |
| IgA                              | 4        | 0     | 0        | 0            |
| IgG                              | 4        | 0     | 0        | 0            |
| IgM                              | 4        | 0     | 0        | 0            |
| Rf-IgM                           | 95       | 29    | 8        | 5            |

---

|                    |     |    |    |    |
|--------------------|-----|----|----|----|
| Rf-IgA             | 97  | 53 | 7  | 19 |
| Rf-IgG             | 112 | 53 | 8  | 10 |
| Leucocytes         | 0   | 1  | 1  | 0  |
| <b>Lymphocytes</b> | 0   | 3  | 2  | 0  |
| <b>Neutrophils</b> | 0   | 3  | 2  | 0  |
| <b>Platelets</b>   | 0   | 1  | 1  | 0  |
| <b>TG</b>          | 0   | 1  | 0  | 0  |
| <b>VCAM</b>        | 6   | 76 | 12 | 10 |

---
